# Supplementary material for: General Unified Microbiome Profiling Pipeline (GUMPP) for Large Scale, Streamlined and Reproducible Analysis of Bacterial 16S rRNA Data to Predicted Microbial Metagenomes, Enzymatic Reactions and Metabolic Pathways
Source: MDPI journal article supplement (doi:10.3390/metabo11060336), 2021-05-24
Supplement: s1 [file s1]

**General Unified Microbiome Profiling Pipeline (GUMPP) for large scale, streamlined and reproducible analysis of bacterial 16S rRNA data to predicted microbial metagenomes, enzymatic reactions and metabolic pathways**

**Boštjan Murovec<sup>1</sup>, Leon Deutsch<sup>2</sup>, Blaž Stres<sup>2,3,4,5</sup>**

<sup>1</sup> University of Ljubljana, Faculty of Electrical Engineering, Tržaška 25, SI-1000 Ljubljana, Slovenia

<sup>2</sup> University of Ljubljana, Biotechnical Faculty, Jamnikarjeva 101, SI-1000 Ljubljana, Slovenia

<sup>3</sup> University of Ljubljana, Faculty of Civil and Geodetic Engineering, Jamova 2, SI-1000 Ljubljana, Slovenia

<sup>4</sup> Jožef Stefan Institute, Department of Automation, Biocybernetics and Robotics, Jamova 39, SI-1000 Ljubljana, Slovenia

<sup>5</sup> University of Innsbruck, Department of Microbiology, Technikerstrasse 25d, A-6020 Innsbruck, Austria

**Correspondence to** Blaž Stres, University of Ljubljana, Biotechnical Faculty, Group for Microbiology and Microbial Biotechnology, Jamnikarjeva 101, 1000 Ljubljana, Slovenia. Email: [blaz.stres@bf.uni-lj.si](mailto:blaz.stres@bf.uni-lj.si); Phone: +38641567633, Fax: +386 1 724 10 05.

## Human as a host

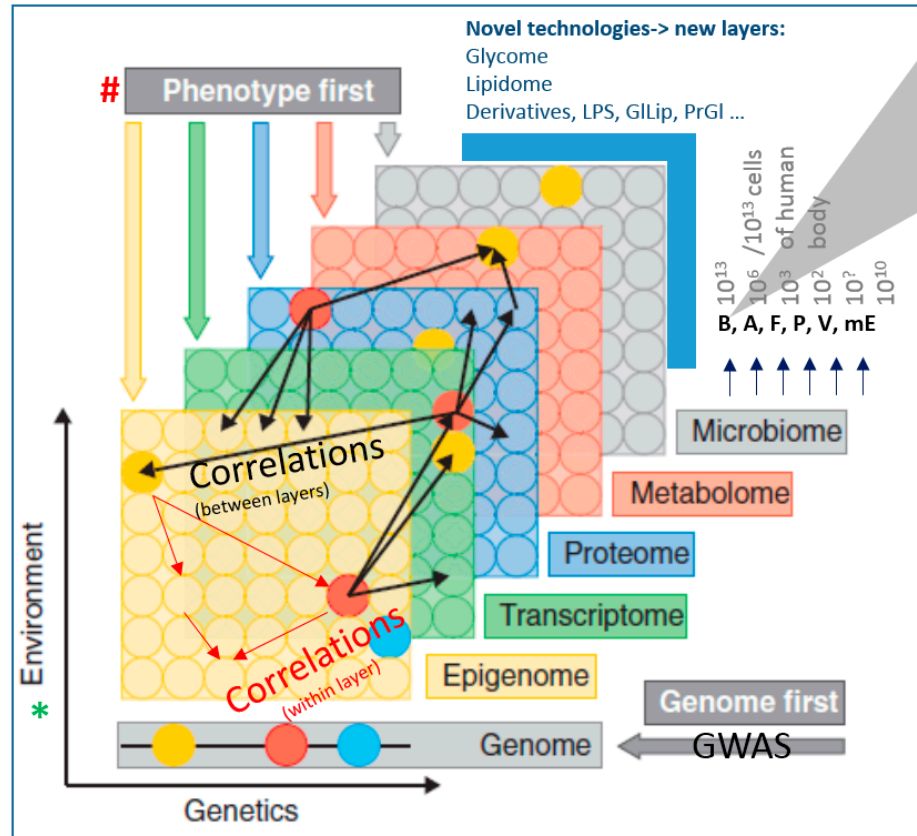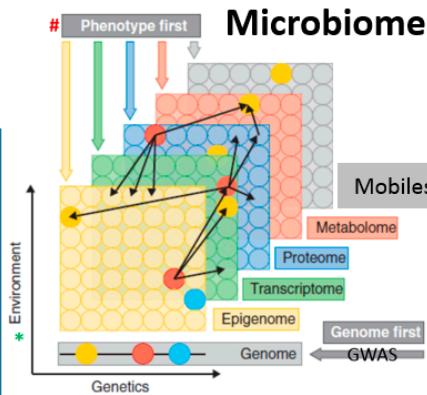

## Bacteria:

16S rRNA taxonomy  
Functional genes  
Enzymatic reactions  
Metabolic pathways

## GUMPP

**Taxonomy** (Genus-, OTU-, ASV- level analyses)

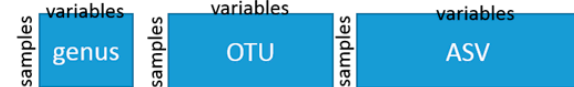

**Predicted functional potential:**

- (i) KO -microbial functional genes (MFG);
- (ii) EC -enzymatic reactions (ER);
- (iii) metabolic pathways (MP)

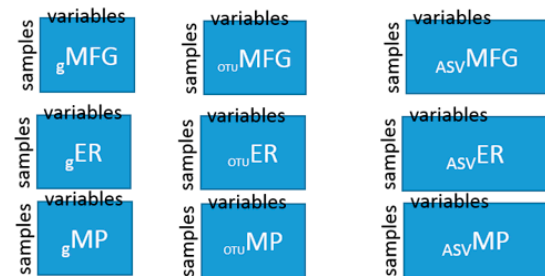

**Figure S1:** A schematic overview of data layers reported in published literature as parts of data driven approach to human disease exploration (Stres and Kronegger, 2019) (CC-BY Licence). The various data matrices generated using the GUMPP are presented in more detail in Figure S2. The data can be analyzed at genus, OTU- and/or ASV- levels. OTU- Operational Taxonomic Units (generally 97% identity of 16S rRNA); ASV – Amplicon Sequence Variants (unique sequence variants). KO – KEGG Orthologs (Kyoto Encyclopedia of Genes and Genomes); EC - Enzyme Commission number; For each level, four output tables are generated (e.g. genus, gMFG, gER, gMP). This figure serves as an example of the multilevel and multi-omic layers of information that are being

integrated in current multi-scale approaches to the integration of microbiological information into natural systems. Circles represent the entire pool of molecules detected in various 'omic' data layers. Genetic regulations and environments are embedded within all data layers, except the genome (GWAS) layer, and can affect each individual molecule to a different extent. The potential interactions or correlations between molecules detected within one layer or between different layers are represented by thin red and black arrows, respectively. As an example of the conceptual framework for consolidating multi-omic data and to understand the function of the system, the gene in a genome (blue circle) is epigenetically regulated (red circle) and controls multiple transcription targets correlated with multiple proteins that generate metabolites, which can have a greater influence on the microbiome layer as well. The three firsts (i.e. the genome first, the phenotype first and the environment first) imply a starting point: the associated locus versus any other layer versus environmental perturbations (i.e. thermodynamic boundaries within which the system routinely operates). GWAS: genome-wide association studies; B: bacteria; A: archaea; F: fungi; P: protozoa; V: viruses; mE: mobile elements; LPS - Lipopolysaccharides; GLip - Glycolipids; PrGI – proteoglycans (Stres and Kronegger, 2019).

**Taxonomy** (Genus-, OTU-, ASV- level analyses)

**Predicted functional potential analyses:**

(i) KO -microbial functional genes (MFG);

(ii) EC -enzymatic reactions (ER);

(iii) metabolic pathways (MP)

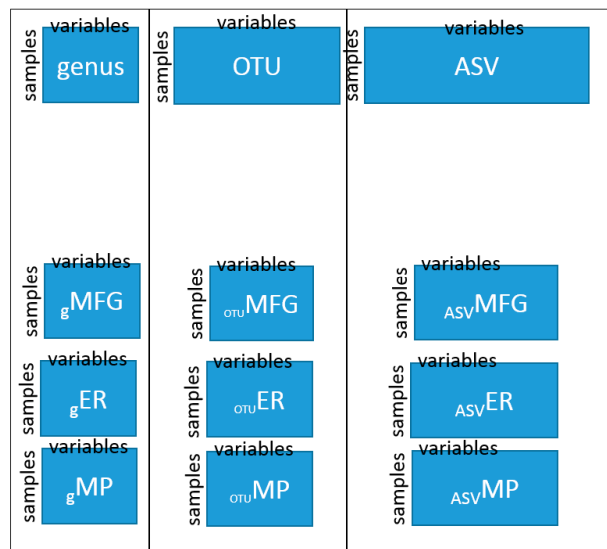

**Figure S2.** The data can be analyzed at genus-, OTU- and/or ASV- levels. The resulting three blocks containing each four data matrices describing specific information (taxonomy, functional genes, enzymatic reactions, metabolic pathways) can be seen. These data can be used for specific downstream data integration. The in depth description of the results of such data integration was beyond the scope of this study. OTU- Operational Taxonomic Units (generally 97% identity of 16S rRNA); ASV – Amplicon Sequence Variants (unique sequence variants). KO – KEGG Orthologs (Kyoto Encyclopedia of Genes and Genomes Orthologs); EC - Enzyme Commission number. Hence, for each level, four output tables are generated for further statistical analyses.

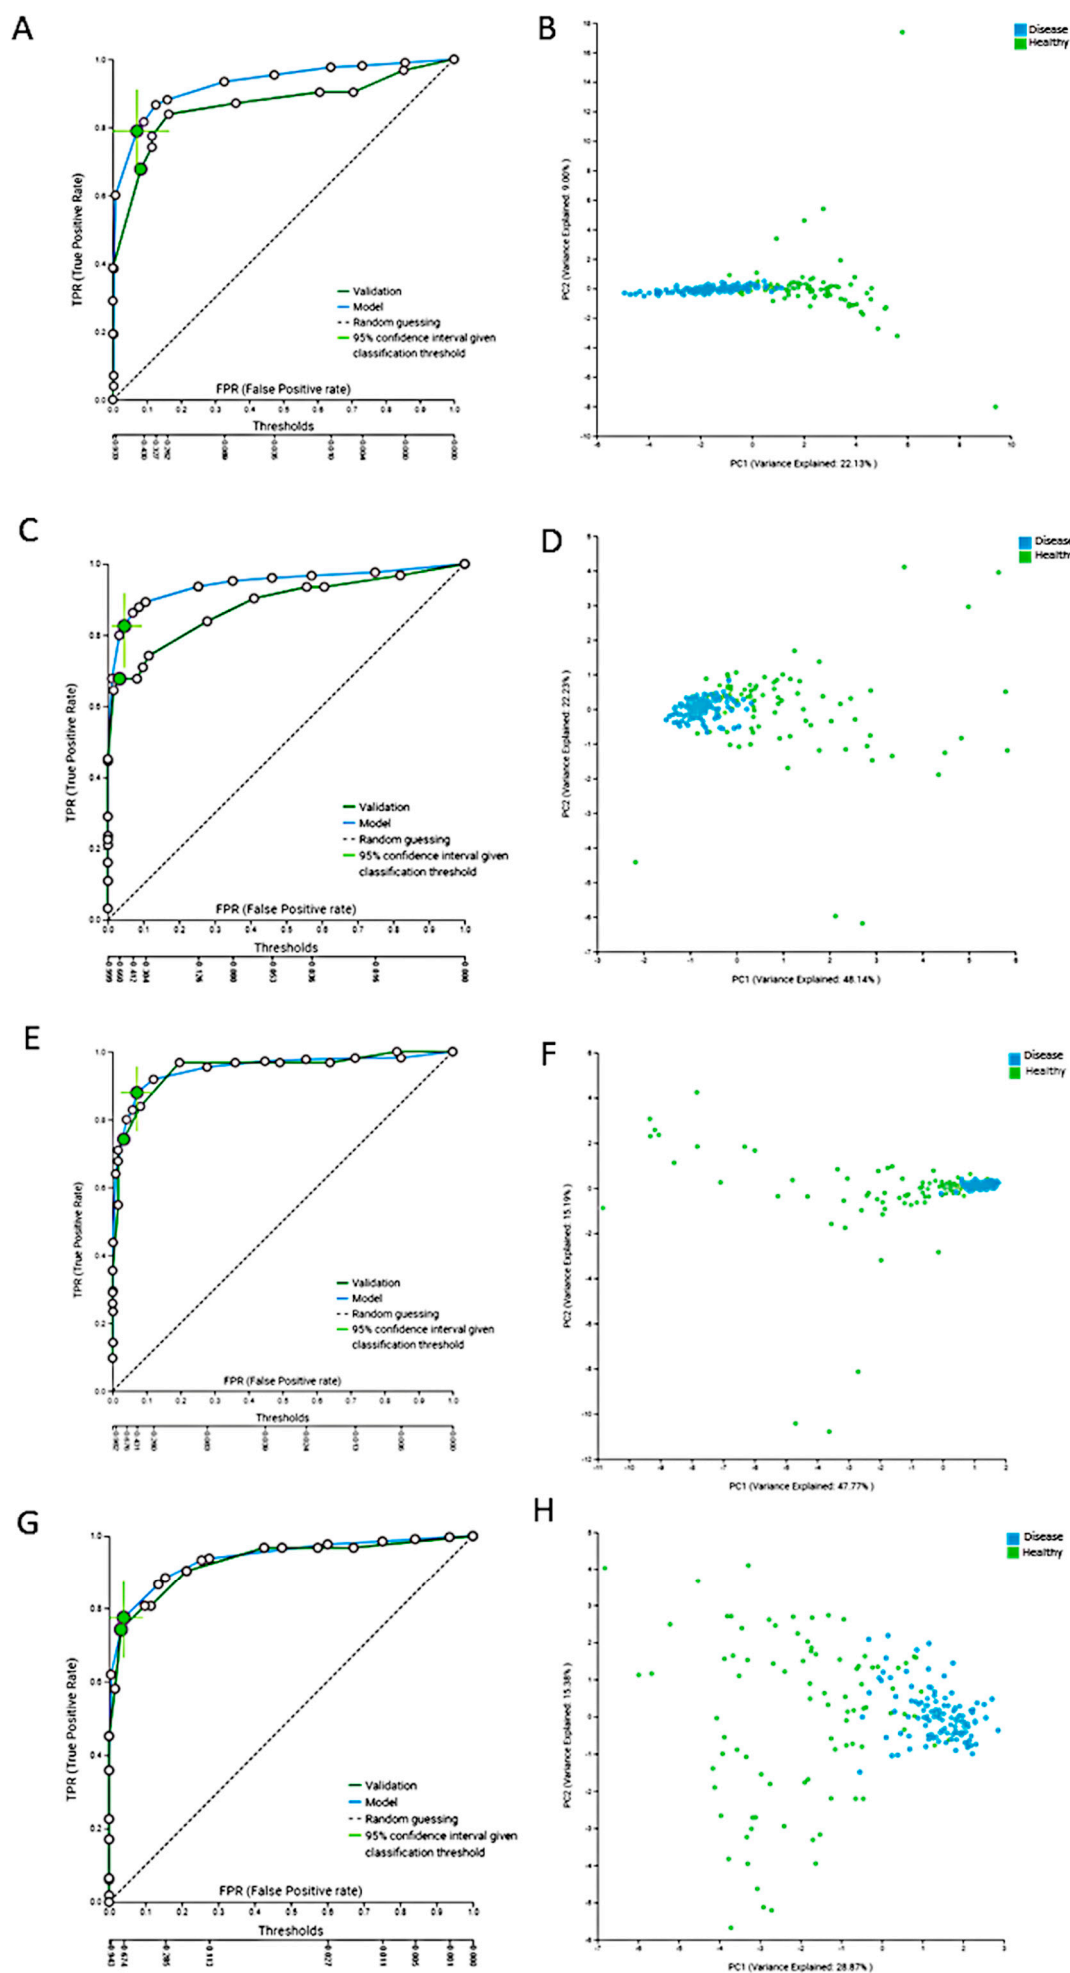

**Figure S3.** An overview of the modelling step based on the four layers of information obtained through the use of GUMPP. Receiver operating curves (A,C,E,G) representing model performance at all four levels: (A) 16S rRNA genus level taxonomy, (C) KO – functional genes, (E) EC – enzymatic reactions, and (G) metabolic pathways. The blue line represents the model generation from the dataset and the green line shows the evaluation of the model on the test dataset. White circles represent thresholds for ROC curve and predictive performance of the model from the optimal specificity to optimal sensitivity. In analogy to the right (B,D,F,H) there are the corresponding PCA plots showing the differences between the healthy (green) and diseased (blue) groups.

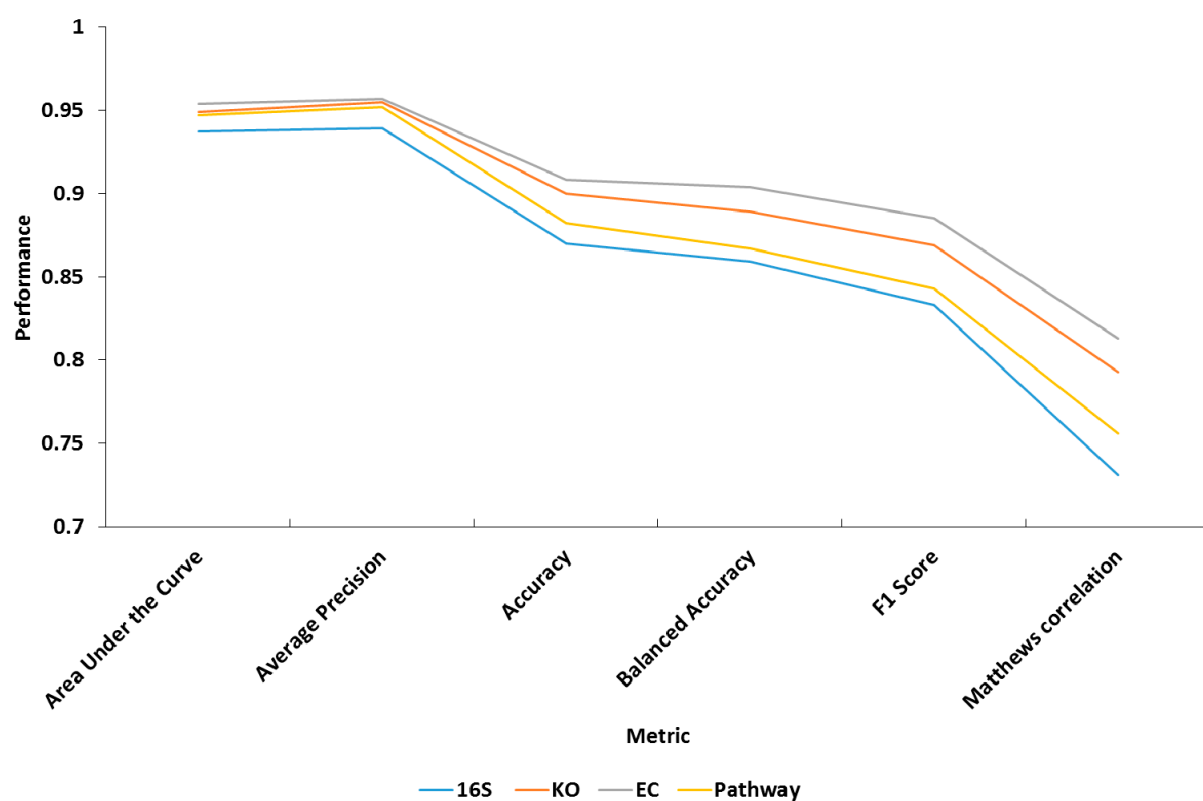

**Figure S4.** An overview of performance characteristics of the JADBIO models based on human intestinal tract data spanning the following data types: 16S rRNA, predicted metagenomes (KO), predicted enzymatic reactions (EC) and metabolic pathways (Pathway). KO and EC data performed slightly better than those based on 16S rRNA and pathway data. Please note the scale of Performance (y-axis).

**Table S1.** Performance metrics of built models based on four different levels of data generated by GUMPP from human dataset.

| <b>Metric</b>                | <b>16S</b> | <b>KO</b> | <b>E.C.</b> | <b>Pathway</b> |
|------------------------------|------------|-----------|-------------|----------------|
| Area Under the Curve         | 0.937      | 0.949     | 0.954       | 0.947          |
| Average Precision            | 0.939      | 0.955     | 0.957       | 0.952          |
| Accuracy                     | 0.87       | 0.9       | 0.908       | 0.882          |
| Balanced Accuracy            | 0.859      | 0.889     | 0.904       | 0.867          |
| F1 Score                     | 0.833      | 0.869     | 0.885       | 0.843          |
| Matthews correlation         | 0.731      | 0.793     | 0.813       | 0.756          |
| Precision                    | 0.894      | 0.931     | 0.906       | 0.94           |
| True Positive Rate           | 0.789      | 0.825     | 0.879       | 0.774          |
| Specificity                  | 0.929      | 0.953     | 0.928       | 0.96           |
| True Positives (TP)          | 0.33       | 0.346     | 0.369       | 0.324          |
| True Negatives (TN)          | 0.041      | 0.027     | 0.539       | 0.023          |
| False Positives (FP)         | 0.54       | 0.554     | 0.042       | 0.558          |
| False Negatives (FN)         | 0.089      | 0.073     | 0.05        | 0.095          |
| Average F1 Score             | 0.859      | 0.891     | 0.898       | 0.858          |
| Average Matthews correlation | 0.727      | 0.798     | 0.789       | 0.731          |



**Table S2.** Human dataset, power analysis. Sample size corresponding to calculated statistical power.

| Pair              | 16S         |             | KO          |             | EC          |             | Pathway     |             |
|-------------------|-------------|-------------|-------------|-------------|-------------|-------------|-------------|-------------|
|                   | Stat. Power | Sample size |
| CD_Healthy        | 0.48        | 1000        | 0.81        | 6           | 0.8         | 60          | 0.82        | 40          |
| CD_Infection      | 0.7         | 1000        | 1           | 1000        | 0.66        | 1000        | 0.66        | 1000        |
| CD_Other          | 0.75        | 1000        | 0.74        | 1000        | 0.8         | 600         | 0.81        | 500         |
| CD_tumor          | 0.8         | 500         | 0.8         | 150         | 0.8         | 200         | 0.8         | 200         |
| CD_UC             | 0.69        | 1000        | 0.73        | 1000        | 0.69        | 1000        | 0.74        | 1000        |
| Healthy_infection | 0.55        | 1000        | 0.79        | 60          | 0.84        | 100         | 0.85        | 100         |
| Healthy_other     | 0.55        | 1000        | 1           | 1000        | 0.8         | 100         | 0.84        | 40          |
| Healthy_tumor     | 0.6         | 1000        | 0.83        | 150         | 0.8         | 400         | 0.81        | 300         |
| Healthy_UC        | 0.8         | 1000        | 0.86        | 100         | 0.8         | 100         | 0.81        | 150         |
| Infection_other   | 0.62        | 1000        | 0.8         | 1000        | 0.78        | 1000        | 0.8         | 1000        |
| Infection_tumor   | 0.78        | 1000        | 0.7         | 1000        | 0.82        | 900         | 0.81        | 1000        |
| Infection_UC      | 0.62        | 1000        | 0.58        | 1000        | 0.53        | 1000        | 0.57        | 1000        |
| Other_tumor       | 0.63        | 1000        | 0.54        | 1000        | 0.49        | 1000        | 0.41        | 1000        |
| Other_UC          | 0.7         | 1000        | 0.55        | 1000        | 0.57        | 1000        | 0.54        | 1000        |
| Tumor_UC          | 0.82        | 1000        | 0.67        | 1000        | 0.79        | 1000        | 0.74        | 1000        |
| Presence_absence  | 0.6         | 1000        | 1           | 10          | 0.86        | 60          | 0.86        | 40          |

## GUMPP's Quick Run Outline

### Prerequisites

- Assure that Singularity version 3.x or 2.6.x is installed (<https://sylabs.io>). Install from repository of your Linux distribution, if needed.
- Assure that Squash file system (squashfs) is installed. Install from repository of your Linux distribution, if needed.
- Download GUMPP's singularity image (<http://gumpp.fe.uni-lj.si>) into a directory of your choice.

### Preparation

- Create a directory (e.g. test) in your home directory and populate it with paired reads.
- Download configuration template [http://gumpp.fe.uni-lj.si/config\\_template.txt](http://gumpp.fe.uni-lj.si/config_template.txt) into directory with input reads and give it a name (e.g. config.txt).
- According to instructions in config file set at least parameters: `in_dir`, `msp_screen_seq_start`, `msp_screen_seq_end` and `msp_sub_sample_size`.
- Set type of an analysis (if not ASV), and filtering of improper sequences according to their length by `msp_screen_seq_min_length` and `msp_screen_seq_max_length`.

```
# Config file example.  
# Do NOT blindly apply the  
# settings below, since they  
# likely will not work for  
# your inputs.  
  
in_dir = /home/alice/samples  
  
msp_screen_seq_start = 6388  
msp_screen_seq_end = 25316  
  
msp_sub_sample_size = 3000  
  
msp_screen_seq_min_length = 430  
msp_screen_seq_max_length = 465  
  
analysis_asv=yes  
#analysis_otu=yes  
#analysis_gen=yes
```

### Execution

- Start GUMPP by invoking the appropriate (suitably adopted) command line:

For Singularity 2.6.x:

```
singularity run /abs_path/gumpp_v1.simg  
/home/username/test/config.txt
```

For Singularity 3.x:

```
singularity run --writable-tmpfs /abs_path/gumpp_v1.simg  
/home/username/test/config.txt
```

```

-----
Handling states and activities of executable units...
-----

-----
A. State evaluation pass 1:
....evaluating: results__PicRust2: generic_gen_original

-----

Z. Applying execution policy:
....starting: results__PicRust2: generic_gen_original

=====
Summary of completed steps:
.....input_orientation_orient_fasta duration 0:00:02
.....results_piphillin_inputs duration 0:00:02
....Avg. input_Mothur_biom_Mothur_script duration 0:16:29 for 2 runs (min: 0:03:54, max: 0:29:05)
....Avg. input_gunzip duration 0:00:01 for 720 runs (min: 0:00:00, max: 0:00:02)

-----
Steps that are being executed (CPUs, disk%, memory GB, start time, tag):
results__PicRust2: 1
-----
16.00 ... 15.00 ... 10 ... 2021-04-07_13:33:14 ... generic_gen_original
=====
2021-04-07 13:33:14 ... duration: 0:37:07 ... (to be updated on state change)

```

**Figure R1:** An example of the GUMPP during processing.

```

=====
Summary of completed steps:
.....input_orientation_orient_fasta duration 0:00:02
.....results__PicRust2 duration 0:03:54
.....results_piphillin_inputs duration 0:00:02
....Avg. input_Mothur_biom_Mothur_script duration 0:16:29 for 2 runs (min: 0:03:54, max: 0:29:05)
....Avg. input_gunzip duration 0:00:01 for 720 runs (min: 0:00:00, max: 0:00:02)

=====
2021-04-07 13:37:09 ... duration: 0:41:02 ... (to be updated on state change)

-----

Summary of activities
-----

No errors or warnings were encountered during workflow execution.

Saving summary to a report file ... Finished.

Total duration: 0:41:02

```

**Figure R2:** An example of the GUMPP at final report of the successful run.

|                                                                         |           |                 |            |
|-------------------------------------------------------------------------|-----------|-----------------|------------|
| 01_results_2021-04-07_12-56-06                                          | 3 items   | 7. 04. 21 13:33 | drwxr-xr-x |
| └─ 00_report                                                            | 9 items   | 7. 04. 21 13:37 | drwxr-xr-x |
| └─ 01_input                                                             | 2 items   | 7. 04. 21 13:33 | drwxr-xr-x |
| └─ 04_Mothur_biom                                                       | 2 items   | 7. 04. 21 13:33 | drwxr-xr-x |
| └─ generic_common                                                       | 1 item    | 7. 04. 21 13:29 | drwxr-xr-x |
| └─ generic_gen                                                          | 4 items   | 7. 04. 21 13:33 | drwxr-xr-x |
| for_picrust2.biom                                                       | 366,3 KiB | 7. 04. 21 13:33 | -rw-r--r-- |
| for_picrust2.fasta                                                      | 89,8 KiB  | 7. 04. 21 13:33 | -rw-r--r-- |
| mothur.1617794958.logfile                                               | 63,5 KiB  | 7. 04. 21 13:33 | -rw-r--r-- |
| stability.paired.trim.contigs.good.unique.good.filter.unique.preclus... | 103,1 KiB | 7. 04. 21 13:33 | -rw-r--r-- |
| └─ 05_orientation                                                       | 1 item    | 7. 04. 21 13:33 | drwxr-xr-x |
| └─ 02_results                                                           | 2 items   | 7. 04. 21 13:37 | drwxr-xr-x |
| └─ 01_PicRust2                                                          | 1 item    | 7. 04. 21 13:37 | drwxr-xr-x |
| └─ generic_gen_original                                                 | 8 items   | 7. 04. 21 13:37 | drwxr-xr-x |
| └─ EC_metagenome_out                                                    | 3 items   | 7. 04. 21 13:36 | drwxr-xr-x |
| └─ intermediate                                                         | 2 items   | 7. 04. 21 13:36 | drwxr-xr-x |
| └─ KO_metagenome_out                                                    | 3 items   | 7. 04. 21 13:36 | drwxr-xr-x |
| └─ pathways_out                                                         | 1 item    | 7. 04. 21 13:37 | drwxr-xr-x |
| EC_predicted.tsv.gz                                                     | 86,5 KiB  | 7. 04. 21 13:37 | -rw-r--r-- |
| KO_predicted.tsv.gz                                                     | 207,8 KiB | 7. 04. 21 13:37 | -rw-r--r-- |
| marker_predicted_and_nsti.tsv.gz                                        | 1,3 KiB   | 7. 04. 21 13:37 | -rw-r--r-- |
| out.tre                                                                 | 628,7 KiB | 7. 04. 21 13:37 | -rw-r--r-- |
| └─ 02_piphillin_inputs                                                  | 1 item    | 7. 04. 21 13:33 | drwxr-xr-x |
| └─ generic_gen                                                          | 2 items   | 7. 04. 21 13:33 | drwxr-xr-x |
| piphillin_OTU_abundance_table.csv                                       | 102,1 KiB | 7. 04. 21 13:33 | -rw-r--r-- |
| piphillin_representatives.fasta                                         | 36,6 KiB  | 7. 04. 21 13:33 | -rw-r--r-- |

**Figure R3:** An example of the GUMPP output files and directory hierarchy produced after the successful run.

## Minimanual 2: Instructions for running a model on a local machine

JADBIO allows the user to download a model and run it on a local machine.

To run our model locally, the user must meet the following requirements:

1. Java SE Development Kit version 15 (<https://www.oracle.com/java/technologies/javase-jdk15-downloads.html>)
2. the Java executor (contained in model.zip - filename: jadbio-1.1.182-model-exe.jar)
3. model (contained in model.zip - filename: jadbio-1.1.164-model.<datasetname>.bin)

After installing Java SE JDK, modelGUMPP.zip must be saved somewhere on the local machine. After saving model.zip, provided by the authors, the folder must be extracted (e.g. with WinZip, 7zip). The model must be executed with the command prompt (cmd) (Fig. 1, 2).

### Step 1

Using the `cd path` command (Fig. 1), the user navigates to the same directory (e.g. Folder) that contains the model executor (.jar) and the model (.bin). In our case, the folder was located on desktop.

```
C:\Windows\System32>cd C:\Users\LDeutsc\Desktop\modelGUMPP
```

**Figure I1.** First command to navigate to the folder containing the model. In this case, we used the `cd C:\Users\LDeutsc\Desktop\model` command because Executor and Model were in the Model folder on the desktop.



|                                         |                 |                     |          |
|-----------------------------------------|-----------------|---------------------|----------|
| jadbio-1.1.164-model-16S_Disease.bin    | 27.1.2021 11:22 | Datoteka BIN        | 14 KB    |
| jadbio-1.1.164-model-EC_disease.bin     | 27.1.2021 11:24 | Datoteka BIN        | 59 KB    |
| jadbio-1.1.164-model-KO_Disease.bin     | 27.1.2021 11:25 | Datoteka BIN        | 150 KB   |
| jadbio-1.1.164-model-Pathway_Disease... | 27.1.2021 11:20 | Datoteka BIN        | 15 KB    |
| jadbio-1.1.182-model-exe                | 27.1.2021 11:25 | Executable Jar File | 5.572 KB |

**Figure I2.** Files needed for the overview of the models created on JADBIO platform. All files are contained in the modelGUMPP.zip folder.

### Step 2

The next step is to preview the model using the following command:

```
Java --enable-preview -jar jadbio-1.1.182-model-exe.jar -n jadbio-1.1.164-model-16S_Disease.bin
```

This allows the user to get an overview of the model, key features and information about the analysis (which algorithm was used, version of JADBIO and other information about the model) (Fig. 3). In upper case, model for 16S dataset was previewed. With the same approach, user can preview all other levels of information (KO, EC, Pathway). All model are part of modelGUMPP.zip file.

```
C:\Users\LDeutsc\Desktop\modelGUMPP>Java --enable-preview -jar jadbio-1.1.182-model-exe.jar -n jadbio-1.1.164-model-16S_Disease.bin

Model created by JAD version:
1.1.164

Model:
Ridge Logistic Regression Model

Signature variables:
Otu016,Otu028,Otu077,Otu019,Otu010,Otu005,Otu112,Otu004,Otu051,Otu079,Otu036,Otu053,Otu026,Otu212,Otu151,Otu020,Otu021,Otu130,Otu113,Otu002,Otu207,Otu048,Otu043,Otu012,Otu066

Analysis info:
id=10993, title='Otu_Disease', type='CLASSIFICATION', target='Disease', dataset='Training_Otu', dataset_id='10699', project='MB_PresenceOfDisease', metric='AUC', feature_selection=true, interpretable=false, max_vars=25, max_signatures=null
```

Figure I3. Overview of the model.

### Step 3

To test the model, the user must prepare data. The user needs to prepare the dataset as shown in Figure 4 and save it in a .csv document (comma separated values). After preparation, the prepared dataset must be saved in the same directory as the model executor and the model itself. Already prepared datasets are included into modelGUMPP.zip folder. Samples from patients are marked with Gxxx and samples from healthy individuals are marked with ZPxxx.

|    | A      | B      | C      | D      | E      | F      | G      | H      | I      | J      | K      | L      | M      | N      | O      | P      | Q      | R      | S      | T      | U      | V      | W      | X      | Y      |
|----|--------|--------|--------|--------|--------|--------|--------|--------|--------|--------|--------|--------|--------|--------|--------|--------|--------|--------|--------|--------|--------|--------|--------|--------|--------|
| 1  | Sample | Otu001 | Otu002 | Otu003 | Otu004 | Otu005 | Otu006 | Otu007 | Otu008 | Otu009 | Otu010 | Otu011 | Otu012 | Otu013 | Otu014 | Otu015 | Otu016 | Otu017 | Otu018 | Otu019 | Otu020 | Otu021 | Otu022 | Otu023 | Otu024 |
| 2  | G002   | 249.5  | 79     | 0      | 0      | 195.67 | 0      | 0      | 0      | 0      | 4.88   | 0      | 531    | 0      | 0      | 0      | 6      | 0      | 0      | 0      | 0      | 0      | 0      | 0      | 0      |
| 3  | G003   | 32.33  | 35     | 162    | 10     | 11.33  | 441    | 0      | 259    | 2.62   | 48     | 0.12   | 0.5    | 34     | 59     | 27     | 1.6    | 0      | 0      | 14     | 0      | 9      | 2      | 51     |        |
| 4  | G006   | 82     | 53     | 107    | 79     | 6.67   | 129    | 0.2    | 72     | 5.5    | 123    | 0      | 0      | 39     | 178    | 174    | 1.6    | 1      | 28     | 47     | 7      | 36     | 33     | 37     |        |
| 5  | G007   | 151.83 | 55     | 331.5  | 100    | 130    | 23     | 0      | 28     | 0.88   | 20     | 0.5    | 0      | 142    | 157    | 15     | 1      | 0      | 0.33   | 35     | 10     | 13     | 3      | 9      |        |
| 6  | G008   | 107    | 36     | 36     | 5      | 2      | 60     | 11     | 5      | 7.38   | 0      | 0      | 0      | 131    | 1      | 2      | 2.4    | 2      | 0      | 0      | 0      | 3      | 1      | 1.5    |        |
| 7  | G009   | 216    | 226    | 138    | 0      | 186    | 0      | 0      | 0      | 0.25   | 0      | 0.5    | 1      | 0      | 0      | 0      | 9.2    | 0      | 0      | 0      | 0      | 45     | 0      | 0      |        |
| 8  | G010   | 147.17 | 139    | 68     | 124    | 0      | 59     | 0      | 122    | 10.62  | 144    | 0.62   | 0      | 0      | 221    | 47     | 0.6    | 0      | 15.33  | 27     | 25     | 2      | 7      | 10.5   |        |
| 9  | G011   | 243    | 340    | 175    | 141    | 7.67   | 50     | 0      | 27     | 3      | 1      | 0      | 0      | 0      | 13     | 22     | 0      | 0      | 0      | 18     | 90     | 22     | 66     | 0      |        |
| 10 | G013   | 0      | 0      | 0      | 0      | 954.67 | 0      | 0      | 0      | 0      | 2.25   | 0      | 0      | 0      | 0      | 0      | 14.8   | 5      | 0      | 0      | 0      | 0      | 0      | 0      |        |
| 11 | G015   | 0.5    | 0      | 1      | 0      | 0.33   | 0      | 0      | 0      | 0      | 0      | 0      | 1296   | 0      | 0      | 0      | 22.6   | 175    | 0      | 0      | 0      | 0      | 0      | 0      |        |
| 12 | G016   | 62.5   | 71     | 353    | 104    | 0      | 19     | 156    | 23     | 25.62  | 24     | 1.25   | 0.5    | 66     | 37     | 15     | 0.2    | 0      | 0      | 26     | 60     | 14     | 12     | 7      |        |
| 13 | G017   | 75.67  | 32     | 113    | 78     | 0      | 91     | 0      | 306    | 8.12   | 9      | 0      | 0      | 38     | 65     | 32     | 12     | 640    | 111.33 | 35     | 26     | 46     | 13     | 7      |        |
| 14 | G018   | 0.17   | 1      | 0      | 1      | 0      | 0      | 0      | 1      | 0      | 0      | 0.12   | 1230.5 | 0      | 1      | 0      | 3.6    | 438    | 0      | 1      | 0      | 0      | 1      | 0      |        |
| 15 | G019   | 134.17 | 85     | 0      | 289    | 8      | 173    | 0      | 263    | 37.88  | 0      | 0      | 5.5    | 47     | 0      | 0      | 0      | 0      | 162    | 0      | 0      | 16     | 0      | 26.5   |        |
| 16 | G021   | 66.67  | 100    | 106.5  | 95     | 0.67   | 2      | 207.4  | 11     | 3.5    | 9      | 0.12   | 0      | 7      | 56     | 0      | 1      | 0      | 0      | 16     | 56     | 15     | 43     | 1      |        |
| 17 | G022   | 148.5  | 70     | 16.5   | 153    | 337.67 | 36     | 0.4    | 0      | 1.12   | 14     | 0.5    | 23     | 3      | 41     | 10     | 10.8   | 1      | 0.67   | 18     | 42     | 2      | 10     | 4      |        |
| 18 | G023   | 50.33  | 167    | 30     | 60     | 10.33  | 64     | 9.2    | 85     | 40.25  | 67     | 0      | 0.5    | 60     | 97     | 42     | 2.4    | 1      | 8      | 31     | 2      | 6      | 14     | 8.5    |        |
| 19 | G024   | 317    | 36     | 42.5   | 147    | 0      | 2      | 0.2    | 0      | 36.88  | 0      | 0      | 2.5    | 0      | 0      | 0      | 0.6    | 0      | 0      | 0      | 0      | 0      | 0      | 0      |        |
| 20 | G025   | 81.83  | 87     | 168.5  | 119    | 3      | 84     | 0      | 14     | 5.38   | 159    | 4.88   | 10.5   | 9      | 91     | 52     | 23.2   | 118    | 0      | 22     | 118    | 24     | 18     | 1      |        |
| 21 | G026   | 0.83   | 0      | 0      | 0      | 0      | 0      | 0      | 0      | 0      | 0      | 59.75  | 1126   | 1      | 0      | 0      | 2.8    | 23     | 0      | 0      | 0      | 0      | 0      | 0      |        |
| 22 | G027   | 107    | 446    | 0.5    | 9      | 27.33  | 15     | 0.2    | 1      | 0.25   | 0      | 0.12   | 0.5    | 0      | 1      | 0      | 3      | 0      | 145    | 11     | 0      | 0      | 0      | 0.5    |        |
| 23 | G029   | 54     | 61     | 57.5   | 83     | 0      | 1      | 0      | 10     | 0.75   | 1      | 0      | 878.5  | 5      | 11     | 0      | 0.6    | 4      | 0      | 3      | 16     | 19     | 18     | 0      |        |
| 24 | ZP0201 | 130.5  | 204    | 191    | 83     | 0      | 116    | 0      | 5      | 3.88   | 192    | 0      | 0      | 27     | 96     | 80     | 0      | 0      | 13     | 36     | 33     | 20     | 122    | 0      |        |
| 25 | ZP0202 | 85.33  | 429    | 221.5  | 61     | 0      | 74     | 0      | 2      | 7.12   | 111    | 0      | 0      | 18     | 144    | 88     | 5.4    | 6      | 5.33   | 30     | 94     | 36     | 28     | 0.5    |        |
| 26 | ZP0203 | 116.17 | 192    | 200.5  | 139    | 3      | 91     | 0      | 4      | 7.38   | 41     | 0      | 0      | 0      | 223    | 69     | 0      | 0      | 0.67   | 53     | 12     | 48     | 30     | 3      |        |

Figure I4. Prepared dataset (Gxxx – patients, ZP – healthy individuals)

### Step 4

After saving the dataset, the user must use the next command in the terminal:

```
java --enable-preview -jar jadbio-1.1.182-model-exe.jar -m jadbio-1.1.164-model-16S_Disease.bin -i 16S.csv -o 16S-output.csv
```

This command runs the model on test data (16S.csv in our case) and creates a new dataset with predictions (16S-output.csv) in the same directory (Fig. 5).

```
C:\Users\LDeutsc\Desktop\modelGUMPP>java --enable-preview -jar jadbio-1.1.182-model-exe.jar -m jadbio-1.1.164-model-16S_Disease.bin -i 16S.csv -o 16S-output.csv
Successfully loaded model from jadbio-1.1.164-model-16S_Disease.bin
Successfully loaded input dataset from 16S.csv
Successfully wrote predictions to 16S-output.csv
```

**Figure I5.** Executing the model and creating the output .csv file with predictions in the same directory.

## Step 5

After model execution, the user can check the calculated predictions by opening the .csv file directly by clicking on the created .csv file and opening it in any data analysis program (Excel, Past, R ...). As shown in Fig. 6 the model correctly classifies the data as healthy and as disease. The first column is the same as in the test data created by the user. The second and third columns show the calculated probabilities for the Disease class (second column) and for the Healthy class (third column).

|    | A                                                    | B | C | D | E |
|----|------------------------------------------------------|---|---|---|---|
| 1  | Sample name,Prob ( class = No ),Prob ( class = Yes ) |   |   |   |   |
| 2  | G002,0.001002513998170461,0.9989974860018296         |   |   |   |   |
| 3  | G003,0.006188487994796388,0.9938115120052037         |   |   |   |   |
| 4  | G006,0.03244377167576495,0.9675562283242352          |   |   |   |   |
| 5  | G007,0.21344073241469658,0.7865592675853034          |   |   |   |   |
| 6  | G008,1.662205223675324E-14,0.9999999999999833        |   |   |   |   |
| 7  | G009,0.00978294979197632,0.9902170502080238          |   |   |   |   |
| 8  | G010,0.38059378538303423,0.6194062146169659          |   |   |   |   |
| 9  | G011,0.3558986812911365,0.6441013187088634           |   |   |   |   |
| 10 | G013,1.426042293669462E-6,0.9999985739577063         |   |   |   |   |
| 11 | G015,1.0312013119790439E-4,0.9998968798688022        |   |   |   |   |
| 12 | G016,0.6630697664911461,0.336930233508854            |   |   |   |   |
| 13 | G017,0.7203809247765964,0.27961907522340357          |   |   |   |   |
| 14 | G018,0.0021416344281555057,0.9978583655718445        |   |   |   |   |
| 15 | G019,0.09418276552485502,0.905817234475145           |   |   |   |   |
| 16 | G021,0.20145221019476015,0.7985477898052399          |   |   |   |   |
| 17 | G022,0.023989052217264092,0.9760109477827359         |   |   |   |   |
| 18 | G023,0.6566292779488401,0.34337072205116             |   |   |   |   |
| 19 | G024,0.0036532571304570684,0.996346742869543         |   |   |   |   |
| 20 | G025,0.20238492540629072,0.7976150745937093          |   |   |   |   |
| 21 | G026,0.0020644605528634444,0.9979355394471365        |   |   |   |   |
| 22 | G027,0.06767381891391504,0.932326181086085           |   |   |   |   |
| 23 | G029,0.0169628259684254,0.9830371740315745           |   |   |   |   |
| 24 | ZP0201,0.995606622909608,0.0043933770903919955       |   |   |   |   |
| 25 | ZP0202,0.9844431548452719,0.015556845154728171       |   |   |   |   |
| 26 | ZP0203,0.9713935861376919,0.02860641386230807        |   |   |   |   |
| 27 | ZP0204,0.9628519972995334,0.03714800270046665        |   |   |   |   |
| 28 | ZP0205,0.9964513828129297,0.0035486171870703262      |   |   |   |   |
| 29 | ZP0206,0.9914327417839056,0.008567258216094274       |   |   |   |   |
| 30 | ZP0207,0.9993187773316771,6.812226683229878E-4       |   |   |   |   |
| 31 | ZP0208,0.9999922191682509,7.780831749115737E-6       |   |   |   |   |
| 32 | ZP0209,0.9537423817282127,0.04625761827178735        |   |   |   |   |
| 33 | ZP0210,0.992287910662175,0.0077120893378250744       |   |   |   |   |
| 34 | ZP0212,0.9997751800877602,2.2481991223975028E-4      |   |   |   |   |
| 35 | ZP0213,0.9978587450615696,0.0021412549384304596      |   |   |   |   |
| 36 | ZP0215,0.9999771364612802,2.2863538719725003E-5      |   |   |   |   |
| 37 | ZP0221,0.9999851754800285,1.4824519971509357E-5      |   |   |   |   |
| 38 | ZP0223,0.9107685137747521,0.08923148622524796        |   |   |   |   |
| 39 | ZP0224,0.9520707932608887,0.04792920673911125        |   |   |   |   |
| 40 | ZP0226,0.8705028304788675,0.1704971605211325         |   |   |   |   |

**Figure I6.** The newly created .csv file with predictions calculated from the test data.
